# Supplementary material for: Prediction Model for Early-Stage Pancreatic Cancer Using Routinely Measured Blood Biomarkers
Source: PubMed Central journal article supplement (PMC10463099; doi:10.1001/jamanetworkopen.2023.31197), 2023-08-28
Supplement: jamanetwopen-e2331197-s002.pdf [file jamanetwopen-e2331197-s002.pdf]

## Data Sharing Statement

Boyd. Prediction Model for Early-Stage Pancreatic Cancer Using Routinely Measured Blood Biomarkers. *JAMA Netw Open*. Published August 28, 2023.

doi:10.1001/jamanetworkopen.2023.31197

### Data

**Data available:** No

### Additional Information

**Explanation for why data not available:** No informed consent from patients to share data in this way.
